# Supplementary material for: High performance white-light-controlled resistance switching memory of an Ag/α-Fe2O3/FTO thin film
Source: Royal Society of Chemistry journal article supplement (doi:10.1039/c5ra24057c), 2016-01-01
Supplement: c5ra24057c1.pdf [file c5ra24057c1.pdf]

# High white-light-controlled resistance switching memory performance of Ag/ $\alpha$ -Fe<sub>2</sub>O<sub>3</sub>/FTO thin film

Mei Tang,<sup>a,b,c</sup> Bai Sun,<sup>a,b,c</sup> Jing Huang,<sup>a,b,c</sup> Ju Gao,<sup>a,b,c,d</sup> Chang Ming Li<sup>a,b,c</sup> \*

<sup>a</sup> Institute for Clean Energy & Advanced Materials, Southwest University, Chongqing 400715, China

<sup>b</sup> Faculty of Materials and Energy, Southwest University, Chongqing 400715, China

<sup>c</sup> Chongqing Key Laboratory for Advanced Materials and Technologies of Clean Energies, Chongqing 400715, China

<sup>d</sup> Institute of Materials Science and Devices, Suzhou University of Science and Technology, Suzhou 215011, China

\* E-mail: ecmlis@swu.edu.cn

## Supporting Information

### 1. The physical nature behind the light-induced changes

An applied electrical field can result in polarization of Fe<sub>2</sub>O<sub>3</sub>. When applying white-light illumination, the Fe<sub>2</sub>O<sub>3</sub> absorbs the light energy and transition occurs, (**Figure S1a**) which enhances the absolute values of V<sub>Set</sub> and V<sub>Reset</sub> to increase the number of memory logic states.

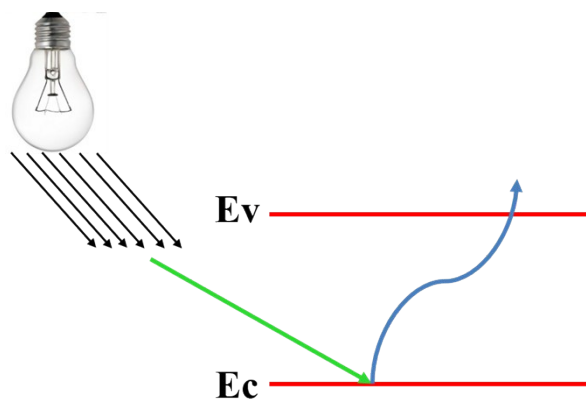

**Figure S1.** The physical nature behind the light-induced changes.

### 2. I–V plotted and fitted to a double logarithmic scale

In the **Figure S2**, the I–V characteristics of the ON state were plotted to fit in a double logarithmic scale, clearly showing an Ohmic conduction behavior with a slope of  $m < 1.0$  to strongly

23 support the formation mechanism of the conductive paths in the device during the SET process. The  
24 fitting results  $m > 3$  at the high electric field, indicate that the charge transport behavior is in  
25 agreement with a trap-controlled space charge-limited current (SCLC) model, and the traps of  
26 oxygen vacancy are formed at the device as-prepared process.<sup>1-3</sup>

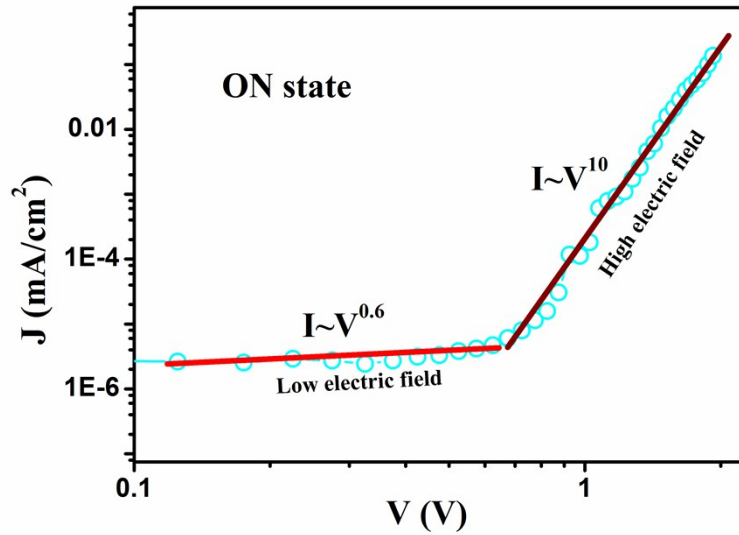

27  
28 **Figure S2.** I–V characteristics of the positive-voltage-sweep region were plotted and fitted to a  
29 double logarithmic scale.

30

### 31 references

- 32 1. Q. Liu, W.Guan, S. Long, R. Jia, M. Liu, J.Chen. Appl. Phys. Lett., 2008, 92, 012117.
- 33 2. A. Carbone, B. K. Kotowska, D. Kotowski. Phy. Rev. Lett., 2005,95(23), 236601.
- 34 3. G. Zhou, B. Wu, Z. Li, Z. Xiao, S. Li, P. Li, Current Appl. Phys., 2015, 15, 279-284.
